# Supplementary material for: Condensation of the fusion focus by the intrinsically disordered region of the formin Fus1 is essential for cell-cell fusion
Source: PubMed Central journal article supplement (PMC9671092; doi:10.1016/j.cub.2022.09.026), 2022-11-07
Supplement: mmc1.pdf [file mmc1.pdf]

**Current Biology, Volume 32**

**Supplemental Information**

**Condensation of the fusion focus by the  
intrinsically disordered region of the  
formin Fus1 is essential for cell-cell fusion**

**Ingrid Billault-Chaumartin, Olivia Muriel, Laetitia Michon, and Sophie G. Martin**

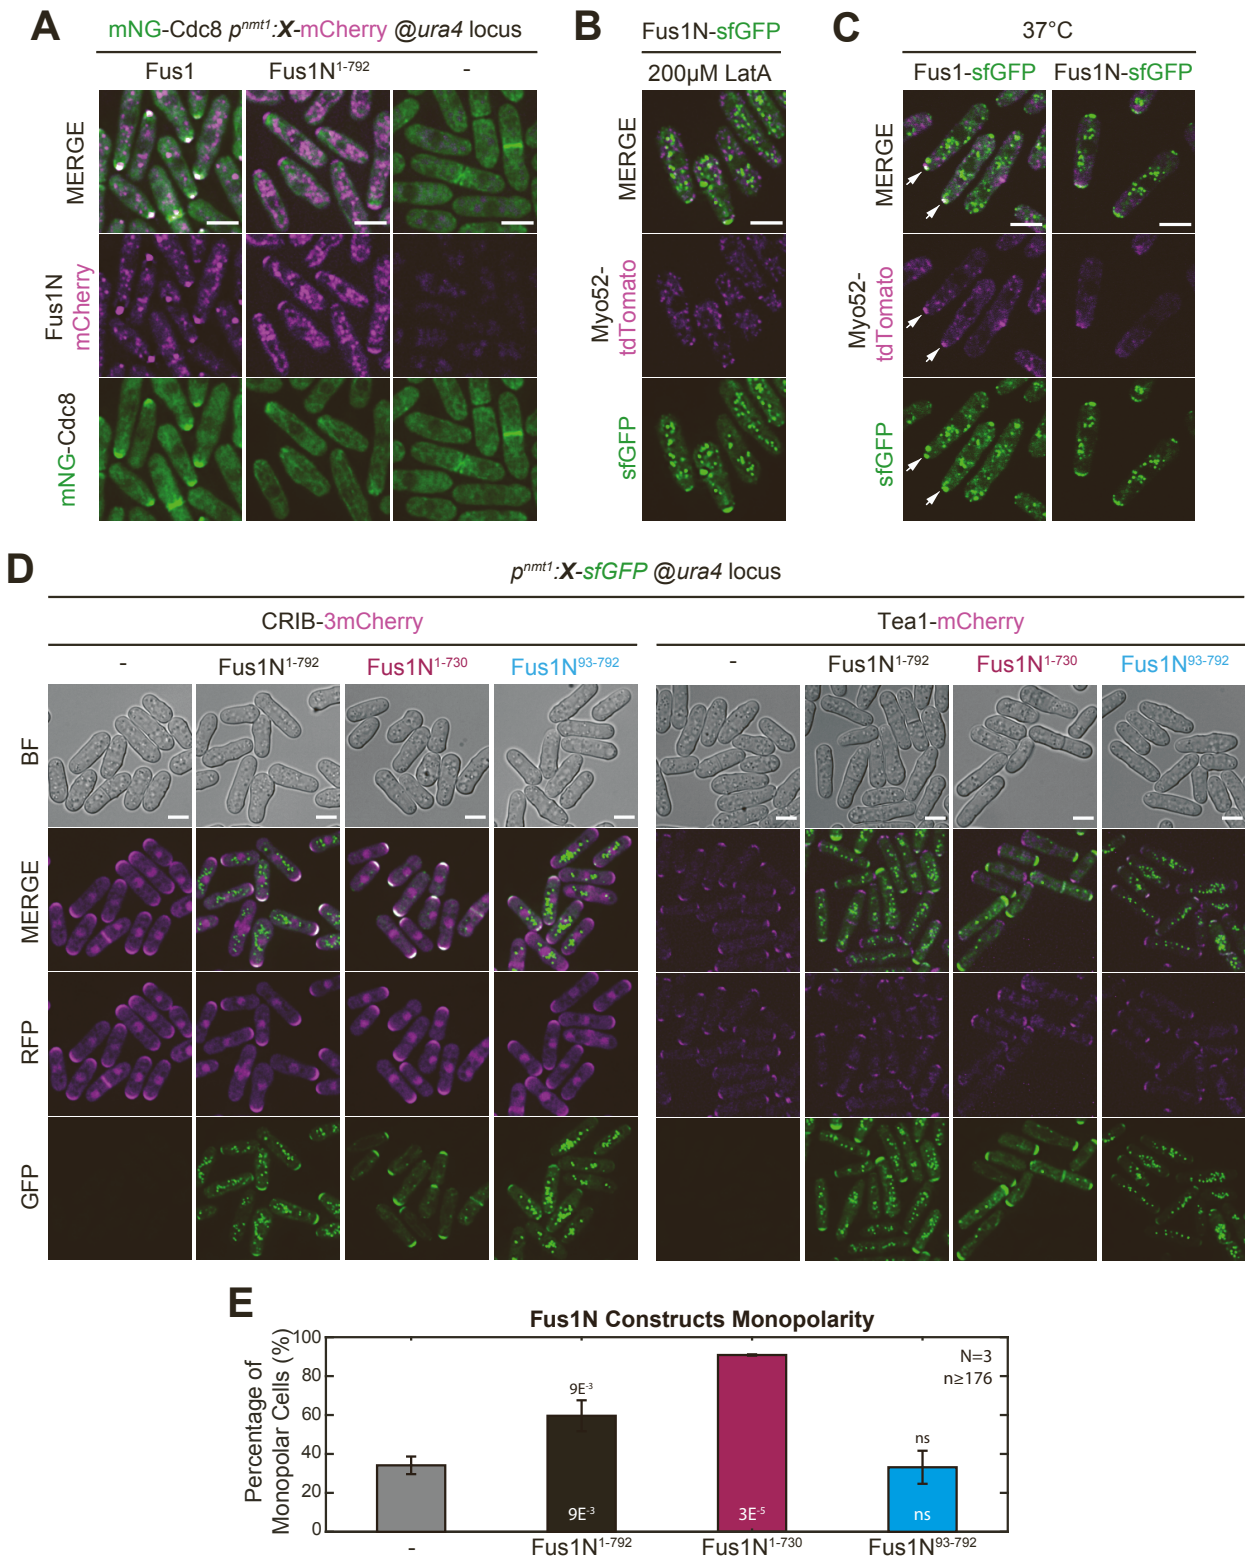

**Figure S1 . Additional localization data and Fus1N tip localization effect on polarity. Related to Figure 1.**

**A.** Interphase cells expressing mNeonGreen-Cdc8, either in combination with (left) full length Fus1-sfGFP or (middle) Fus1N-sfGFP (Fus1<sup>1-792</sup>) or (right) alone. **B.** Interphase cells expressing Myo52-tdTomato and Fus1N-sfGFP (Fus1<sup>1-792</sup>). Cells were treated with 200μM LatrunculinA for 5 minutes. **C.** Interphase cells expressing Myo52-tdTomato and either (left) full length Fus1-sfGFP or (right) Fus1N-sfGFP (Fus1<sup>1-792</sup>) grown for 6h at 37°C and imaged at 40°C. White arrows mark resistant fusion focus-like structure. **D.** DIC

and fluorescence images of either (left) the polarity marker CRIB-3mCherry or (right) Tea1-mCherry in interphase WT or Fus1N<sup>1-792</sup>, Fus1N<sup>1-730</sup> or Fus1N<sup>93-792</sup>-expressing cells. **E.** Monopolarity of the strains as in (D), assessed from the localization of CRIB on a single snapshot. Of note, a fraction of WT cells appear monopolar using this assay, because they are either before NETO or at a time point in CRIB oscillations<sup>52</sup> where only one tip is decorated. All p-values are relative to WT. Bars are 5µm.

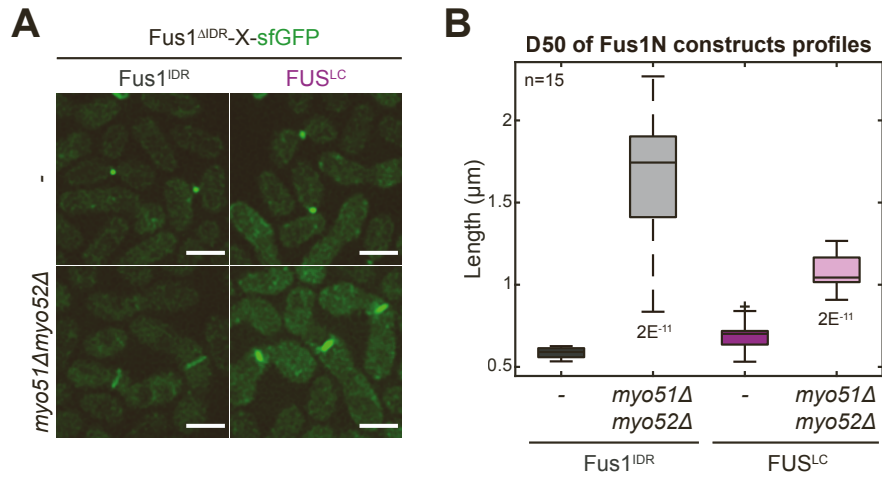

**Figure S2. Type V myosins are required for fusion focus focalization in both WT cells and cells in which Fus1 IDR was replaced by FUS<sup>LC</sup>. Related to Figure 4.**

**A.** Images of (left) Fus1-sfGFP or (right) Fus1<sup>1-491</sup>-FUS<sup>LC</sup>-Fus1<sup>792-1372</sup>-sfGFP in mating cell pairs that are otherwise WT (top) or carry deletions of *myo51Δ* and *myo52Δ* (bottom). **B.** Width at half maximum of GFP-fluorescence profiles in strains as in (A). p-values compare WT Fus1 and Fus1<sup>1-491</sup>-FUS<sup>LC</sup>-Fus1<sup>792-1372</sup> in each background. Bars are 5µm.

**Table S1: Strains used in this study and links to figures. Related to STAR Methods.**

| GENOTYPE                                                                                                                                                                                                                | FIGURES  | STRAIN  |
|-------------------------------------------------------------------------------------------------------------------------------------------------------------------------------------------------------------------------|----------|---------|
| h90 myo52-tdTomato:natMX fus1-sfGFP:kanMX ura4- leu1-32 ade6-M216                                                                                                                                                       | 1, 4, S2 | YSM3312 |
| h90 myo52-tdTomato:natMX fus1Δ::LEU2+ ura4-294:p <sup>fus1</sup> -fus1N <sup>1-792</sup> -fus1C <sup>793-1372</sup> -sfGFP:ura4+ leu1-32                                                                                | 1        | YSM2504 |
| h90 myo52-tdTomato:natMX fus1Δ::LEU2+ ura4-294:p <sup>fus1</sup> -cdc12N <sup>1-887</sup> -fus1C <sup>793-1372</sup> -sfGFP:ura4+ leu1-32                                                                               | 1        | YSM2512 |
| h90 myo52-tdTomato:natMX fus1Δ::LEU2+ ura4-294:p <sup>fus1</sup> -for3N <sup>1-714</sup> -fus1C <sup>793-1372</sup> -sfGFP:ura4+ leu1-32                                                                                | 1        | YSM2510 |
| h90 myo52-tdTomato:natMX ura4+:p <sup>nmt1</sup> :fus1N <sup>1-792</sup> -sfGFP:term <sup>nmt</sup> leu1-32 ade6-M210                                                                                                   | 1, 3, S1 | YSM4002 |
| h90 myo52-tdTomato:natMX ura4+:p <sup>nmt1</sup> :fus1N <sup>1-730</sup> -sfGFP:term <sup>nmt</sup> leu1-32 ade6-M210                                                                                                   | 1, 3     | YSM4003 |
| h90 myo52-tdTomato:natMX ura4+:p <sup>nmt1</sup> :fus1N <sup>1-500</sup> -sfGFP:term <sup>nmt</sup> leu1-32 ade6-M210                                                                                                   | 1, 3     | YSM4004 |
| h90 myo52-tdTomato:natMX ura4+:p <sup>nmt1</sup> :fus1N <sup>93-792</sup> -sfGFP:term <sup>nmt</sup> leu1-32 ade6-M210                                                                                                  | 1        | YSM4005 |
| h90 myo52-tdTomato:natMX ura4+:p <sup>nmt1</sup> :fus1N <sup>140-792</sup> -sfGFP:term <sup>nmt</sup> leu1-32 ade6-M210                                                                                                 | 1        | YSM4006 |
| h90 myo52-tdTomato:natMX ura4+:p <sup>nmt1</sup> :fus1N <sup>191-792</sup> -sfGFP:term <sup>nmt</sup> leu1-32 ade6-M210                                                                                                 | 1, 3     | YSM4007 |
| h90 myo52-tdTomato:natMX ura4+:p <sup>nmt1</sup> :fus1N <sup>431-755</sup> -sfGFP:term <sup>nmt</sup> leu1-32 ade6-M210                                                                                                 | 1        | YSM4008 |
| h90 myo52-tdTomato:natMX ura4+:p <sup>nmt1</sup> :fus1-sfGFP:term <sup>nmt</sup> leu1-32 ade6-M210                                                                                                                      | 1, S1    | YSM4009 |
| h90 leu1-32:p <sup>cdc8</sup> :mNeonGreen-cdc8:term <sup>cdc8</sup> :term <sup>ScADH1</sup> :leu1+ ura4-D18 ade6-M216                                                                                                   | S1       | YSM3786 |
| h90 ura4+:p <sup>nmt1</sup> :fus1-mCherry:term <sup>nmt</sup> leu1-32:p <sup>cdc8</sup> :mNeonGreen-cdc8:term <sup>cdc8</sup> :term <sup>ScADH1</sup> :leu1+ ade6-M216                                                  | S1       | YSM4042 |
| h90 ura4+:p <sup>nmt1</sup> :fus1N <sup>1-792</sup> -mCherry:term <sup>nmt</sup> leu1-32:p <sup>cdc8</sup> :mNeonGreen-cdc8:term <sup>cdc8</sup> :term <sup>ScADH1</sup> :leu1+ ade6-M216                               | S1       | YSM4043 |
| h+ his5+:p <sup>act1</sup> :CRIB-3mCherry:bsdMX ura4-D18                                                                                                                                                                | S1       | YSM4010 |
| h90 his5+:p <sup>act1</sup> :CRIB-3mCherry:bsdMX ura4+:p <sup>nmt1</sup> :fus1N <sup>1-792</sup> -sfGFP:term <sup>nmt</sup> leu1-32                                                                                     | S1       | YSM4011 |
| h90 his5+:p <sup>act1</sup> :CRIB-3mCherry:bsdMX ura4+:p <sup>nmt1</sup> :fus1N <sup>1-730</sup> -sfGFP:term <sup>nmt</sup> ade6-M210                                                                                   | S1       | YSM4012 |
| h90 his5+:p <sup>act1</sup> :CRIB-3mCherry:bsdMX ura4+:p <sup>nmt1</sup> :fus1N <sup>93-792</sup> -sfGFP:term <sup>nmt</sup> leu1-32 ade6-M210                                                                          | S1       | YSM4013 |
| h90 tea1-mCherry:kanMX ura4-D18 leu1-32                                                                                                                                                                                 | S1       | YSM4014 |
| h90 tea1-mCherry:kanMX ura4+:p <sup>nmt1</sup> :fus1N <sup>1-792</sup> -sfGFP:term <sup>nmt</sup> leu1-32                                                                                                               | S1       | YSM4015 |
| h90 tea1-mCherry:kanMX ura4+:p <sup>nmt1</sup> :fus1N <sup>1-730</sup> -sfGFP:term <sup>nmt</sup> leu1-32                                                                                                               | S1       | YSM4016 |
| h90 tea1-mCherry:kanMX ura4+:p <sup>nmt1</sup> :fus1N <sup>93-792</sup> -sfGFP:term <sup>nmt</sup> leu1-32 ade6-M210                                                                                                    | S1       | YSM4017 |
| h90 myo52-tdTomato:natMX fus1-sfGFP:kanMX                                                                                                                                                                               | 2        | YSM3888 |
| h90 myo52-tdTomato:natMX fus1-sfGFP:kanMX acp2Δ::bleMX ura4- leu1-32 ade6-M210                                                                                                                                          | 2        | YSM3314 |
| h90 myo52-tdTomato:natMX ura4+:p <sup>nmt1</sup> :fus1N <sup>93-792</sup> -sfGFP:term <sup>nmt</sup> fus1Δ::hphMX ade6-M210 leu1-32                                                                                     | 2        | YSM4018 |
| h90 myo52-tdTomato:natMX ura4+:p <sup>nmt1</sup> :fus1-sfGFP:term <sup>nmt</sup> fus1Δ::hphMX ade6-M210 leu1-32                                                                                                         | 2        | YSM4053 |
| h90 myo52-tdTomato:natMX ura4-294:p <sup>fus1</sup> :fus1N-sfGFP:ura4+ fus1Δ::LEU2+ leu1-32                                                                                                                             | 3        | YSM2486 |
| h90 myo52-tdTomato:natMX ura4-294:p <sup>fus1</sup> :fus1N-sfGFP:ura4+ leu1-32                                                                                                                                          | 3        | YSM2699 |
| h90 myo52-tdTomato:natMX ura4+:p <sup>nmt1</sup> :fus1N <sup>1-792</sup> -sfGFP:term <sup>nmt</sup> fus1Δ::hphMX leu1-32 ade6-M210                                                                                      | 3        | YSM4054 |
| h90 myo52-tdTomato:natMX ura4+:p <sup>nmt1</sup> :fus1N <sup>191-792</sup> -sfGFP:term <sup>nmt</sup> fus1Δ::hphMX leu1-32 ade6-M210                                                                                    | 3        | YSM4055 |
| h90 myo52-tdTomato:natMX ura4+:p <sup>nmt1</sup> :fus1N <sup>1-730</sup> -sfGFP:term <sup>nmt</sup> fus1Δ::hphMX leu1-32 ade6-M210                                                                                      | 3        | YSM4056 |
| h90 myo52-tdTomato:natMX ura4+:p <sup>nmt1</sup> :fus1N <sup>1-500</sup> -sfGFP:term <sup>nmt</sup> fus1Δ::hphMX leu1-32 ade6-M210                                                                                      | 3        | YSM4057 |
| h90 myo52-tdTomato:natMX fus1 <sup>Δ501-749</sup> -sfGFP:kanMX ura4-294 leu1-32 ade6-M210                                                                                                                               | 3        | YSM4019 |
| h90 myo52-tdTomato:natMX fus1 <sup>Δ501-791</sup> -sfGFP:kanMX ura4-294 leu1-32 ade6-M210                                                                                                                               | 3        | YSM4020 |
| h90 myo52-tdTomato:natMX fus1 <sup>Δ492-791</sup> -sfGFP:kanMX ura4-294 leu1-32 ade6-M210                                                                                                                               | 3, 4     | YSM4021 |
| h90 myo52-tdTomato:natMX fus1 <sup>Δ492-500</sup> -sfGFP:kanMX ura4-294 leu1-32 ade6-M210                                                                                                                               | 3        | YSM4044 |
| h90 myo52-tdTomato:natMX fus1 <sup>Δ731-791</sup> -sfGFP:kanMX ura4-294 leu1-32 ade6-M210                                                                                                                               | 3        | YSM4045 |
| h90 myo52-tdTomato:natMX fus1 <sup>Δ492-749</sup> -sfGFP:kanMX ura4-294 leu1-32 ade6-M210                                                                                                                               | 3        | YSM4046 |
| h90 myo52-tdTomato:natMX fus1 <sup>1-491</sup> -FUS <sup>12E</sup> -fus1 <sup>792-1372</sup> -sfGFP:kanMX ura4-294 leu1-32 ade6-M210                                                                                    | 4        | YSM4022 |
| h90 myo52-tdTomato:natMX fus1 <sup>1-491</sup> -FUS-fus1 <sup>792-1372</sup> -sfGFP:kanMX ura4-294 leu1-32 ade6-M210                                                                                                    | 4, S2    | YSM4023 |
| h90 myo52-tdTomato:natMX fus1 <sup>1-491</sup> -CRY2 <sup>PHR</sup> -fus1 <sup>792-1372</sup> -sfGFP:kanMX ura4-294 leu1-32 ade6-M210                                                                                   | 4        | YSM4024 |
| h90 myo52-tdTomato:natMX fus1 <sup>1-491</sup> -CRY2 <sup>olig</sup> -fus1 <sup>792-1372</sup> -sfGFP:kanMX ura4-294 leu1-32 ade6-M210                                                                                  | 4        | YSM4025 |
| h90 myo52-tdTomato:natMX fus1 <sup>1-491</sup> -FUS <sup>G156E</sup> -fus1 <sup>792-1372</sup> -sfGFP:kanMX ura4-294 leu1-32 ade6-M210                                                                                  | 4        | YSM4047 |
| h90 myo52-tdTomato:natMX leu1-32:p <sup>cdc8</sup> :mNeonGreen-cdc8:term <sup>cdc8</sup> :term <sup>ScADH1</sup> :leu1+ fus1:kanMX ura4-294 ade6-M210                                                                   | 4        | YSM4026 |
| h90 myo52-tdTomato:natMX leu1-32:p <sup>cdc8</sup> :mNeonGreen-cdc8:term <sup>cdc8</sup> :term <sup>ScADH1</sup> :leu1+ fus1 <sup>1-491</sup> -CRY2 <sup>PHR</sup> -fus1 <sup>792-1372</sup> :kanMX ura4-294 ade6-M210  | 4        | YSM4048 |
| h90 myo52-tdTomato:natMX leu1-32:p <sup>cdc8</sup> :mNeonGreen-cdc8:term <sup>cdc8</sup> :term <sup>ScADH1</sup> :leu1+ fus1 <sup>1-491</sup> -CRY2 <sup>olig</sup> -fus1 <sup>792-1372</sup> :kanMX ura4-294 ade6-M210 | 4        | YSM4049 |
| h90 myo52-tdTomato:natMX leu1-32:p <sup>cdc8</sup> :mNeonGreen-cdc8:term <sup>cdc8</sup> :term <sup>ScADH1</sup> :leu1+ fus1 <sup>1-491</sup> -FUS-fus1 <sup>792-1372</sup> :kanMX ura4-294 ade6-M210                   | 4        | YSM4050 |
| h90 myo52-tdTomato:natMX leu1-32:p <sup>cdc8</sup> :mNeonGreen-cdc8:term <sup>cdc8</sup> :term <sup>ScADH1</sup> :leu1+ fus1 <sup>1-491</sup> -FUS <sup>12E</sup> -fus1 <sup>792-1372</sup> :kanMX ura4-294 ade6-M210   | 4        | YSM4051 |
| h90 fus1-sfGFP:kanMX myo51Δ::ura4+ myo52Δ::ura4+ leu1-32                                                                                                                                                                | S2       | YSM2543 |
| h90 fus1 <sup>1-491</sup> -FUS-fus1 <sup>792-1372</sup> -sfGFP:kanMX myo51Δ::ura4+ myo52Δ::ura4+ leu1-32                                                                                                                | S2       | YSM4052 |

**Table S2: Primers used in this study and their usage**HR stands for homologous recombination in yeast <sup>45</sup> and SDM for site directed mutagenesis

| NAME    | SEQUENCE                                                                                                   | ORIENTATION | PURPOSE           |
|---------|------------------------------------------------------------------------------------------------------------|-------------|-------------------|
| osm765  | CAGCTCCAAATTTTGAAGTAAAACCCTAATTAGGGAATAAATAAGTAGGCAGAGCAC<br>CTTGAAAAATACTAGATAGAATTCGAGCTCGTTTAAAC        | R           | HR<br>(Myo52 3')  |
| osm932  | AATAAAAAGAGACAAACAGTCGTCCTTAAAGCTGAATGCATGCTTAAGCAGCTGGAGA<br>ATAACAATGAACCTTAAGAGACGGATCCCCGGGTTAATTAA    | F           | HR<br>(Fus1 ORF)  |
| osm933  | TTTTATTAATTATAATTTTATTATAATTTGTTTAAAGTCATTTAATTGTCATTAAGATCATT<br>AACATTTCAAACATCAGAATTCGAGCTCGTTTAAAC     | R           | HR<br>(Fus1 3')   |
| osm1196 | GATCACTGTAGGCAACGTAGCCGACAATGATGTACAGAAGCTCGAGCGACGAAGAAAAT<br>CAAGTACCAAATGGTATTAAGTTCGGATCCCCGGGTTAATTAA | F           | HR<br>(Myo52 ORF) |
| osm1746 | ACGGATTTTCATGAAGTTATTGGTTAAAAGCGGCCCTCTCAAATCTCCAGCTAAAGAACCA<br>GTCCATGACAACGAAAATCGGATCCCCGGGTTAATTAA    | F           | HR<br>(Tea1 ORF)  |
| osm1747 | ATGTCATCGTCGAATATTACACTATGTACAGTCTTTTCAACTAGTAAAGGAGATGCTTT<br>CAAAATAGTTCCAAGAGGAATTCGAGCTCGTTTAAAC       | R           | HR<br>(Tea1 3')   |
| osm1772 | CGTATCACGAGGCCCTTTCG                                                                                       | F           | CLONING           |
| osm2217 | CCGGATCTCCAAGGGTGAAGAGCTATTTACTGGGG                                                                        | F           | CLONING           |
| osm3005 | ACTGCGGCCGCATGATGACGGCTAGTTTTAAAGG                                                                         | F           | CLONING           |
| osm3006 | ACTCCCGGGTCTCTTAAGTTCATTGTTATTCTCC                                                                         | R           | CLONING           |
| osm3007 | ACTGCGGCCGCATGGCATCTAAAATGCCTGAAG                                                                          | F           | CLONING           |
| osm3009 | ACTGCGGCCGCATGCGAAAATTCGTCAAAGGGAC                                                                         | F           | CLONING           |
| osm3026 | CTTGGATCCTCATATTTTCTATTTTAGAAAACCTC                                                                        | R           | CLONING           |
| osm3027 | TGAGGATCCAAGAAGTTATTGATGGGAATCC                                                                            | F           | CLONING           |
| osm3028 | CTGGGATCCATGGCGAAGGCGAGGAAG                                                                                | R           | CLONING           |
| osm3030 | TCGGGATCCTACTATTGTTGCTAACTGTTTCTGC                                                                         | R           | CLONING           |
| osm3031 | GTAGGATCCCGAAGCTTTGATATTCCTAATGATGC                                                                        | F           | CLONING           |
| osm3091 | CGGGGTACCGATCAGAAAATTATCGCCAT                                                                              | F           | CLONING           |
| osm3516 | ACTGCGGCCGCTGATTTAACAAAGCGACTATAAGTC                                                                       | R           | CLONING           |
| osm3521 | ACTCCCGGGAGTAGAAGTGTAGGAGCTTC                                                                              | R           | CLONING           |
| osm4021 | CTTGGATCCTATGAACCTCAAAGAATGCGTTG                                                                           | R           | CLONING           |
| osm4504 | CATTAAGGCCCTACTTTTATTCTGAGATCGCTATCCGGTGTATTCTTTTGTAAAGCAT<br>TATATCATCAACTACCCGGATCCCCGGGTTAATTAA         | F           | HR<br>(Acp2 5')   |
| osm4505 | CAATCTTTCTATGACTATTTTCGTTGAAGATGGAACGAATACTATGAGAAGATCACGGAA<br>AGAAAACAAAAGCAATCGAATTCGAGCTCGTTTAAAC      | R           | HR<br>(Acp2 3')   |
| osm4577 | GGAATAAGGGCGACACGG                                                                                         | F           | ANALYTICAL        |
| osm5452 | GGCCACTAGTGGATCTGATATCGATGTATTTACTGATTACTT                                                                 | R           | INFUSION          |
| osm5453 | CTTCTAAACGGCTAGCTCAGCTTCATTGG                                                                              | F           | SDM               |
| osm5454 | CAATGAAGCTGAGCTAGCCGTTTAGAAGG                                                                              | R           | SDM               |
| osm6064 | CATATGGTCTGGGTATCT                                                                                         | R           | CLONING           |
| osm6183 | GCCTTCCAACAGCTTCTCT                                                                                        | R           | ANALYTICAL        |
| osm6576 | CTTGGATCCATCATTATTTGAATTACCAT                                                                              | R           | CLONING           |
| osm6582 | CTTGTTTAAACCAACATGCCTGTAAG                                                                                 | R           | CLONING           |
| osm6583 | GAAGTTTAAACTGCTTTTGTGGTTATC                                                                                | F           | CLONING           |
| osm7119 | CTTCGTACGCTGCAGGTCGACACAGATGTACGCCAC                                                                       | F           | INFUSION          |
| osm7122 | TTCACCTTGGAGTTAATTAATCTCTTAAGTTCATTGTTAT                                                                   | R           | INFUSION          |
| osm7127 | ATGTACCAGGCGAAGCGCTTCTATGTCGGATGAC                                                                         | F           | INFUSION          |
| osm7140 | CTTCTTTGATTCTCATATCAGCTTGTAAGTAAGC                                                                         | R           | INFUSION          |
| osm7141 | TACTTTACAAGCTGATATGAGAATCAAAGAAGTTAT                                                                       | F           | INFUSION          |
| osm7204 | CTTTGTAAATCAGCGGCCGCATGTTTACCGATTTCATATGTA                                                                 | F           | INFUSION          |
| osm7205 | CTTGGAGTTAATTAACCCGGGGATCCTCATATTTTC                                                                       | R           | INFUSION          |
| osm7254 | GCTTTGTAAATCAGCGGCCGCATGATGAC                                                                              | F           | INFUSION          |
| osm7255 | CTTGGAGTTAATTAACCCGGGGATCCTATCATTATTTGAATTACCA                                                             | R           | INFUSION          |
| osm7256 | CTTTGTAAATCAGCGGCCGCATGAAGCACACTCAAATTTCT                                                                  | F           | INFUSION          |
| osm7257 | CTTGGAGTTAATTAACCCGGGGATCCTAAAACCTTGTGTTTGA                                                                | R           | INFUSION          |
| osm7487 | CTTCTTTGATTCTCATATCATTATTTGAATTACCAT                                                                       | R           | INFUSION          |
| osm7488 | TAATTCAAATAATGATATGAGAATCAAAGAAGTTAT                                                                       | F           | INFUSION          |
| osm7489 | AAACCTTGTGTTTGAATCAGCTTGTAAGTAAG                                                                           | R           | INFUSION          |
| osm7490 | TACTTTACAAGCTGATTCAAAACACAAGGTTTTTA                                                                        | F           | INFUSION          |
| osm7499 | GCTTTGTAAATCAGCGGCCGCATGCTCAAGTACGTGGAATCTTT                                                               | F           | INFUSION          |

|         |                                             |   |          |
|---------|---------------------------------------------|---|----------|
| osm7638 | CTTTGTAAATCAGCGGCCGCATGGTTACTCTCTCAAGAAAA   | F | INFUSION |
| osm7677 | GGAGTATTAACAACACTCGAGAAATGCGTGAAACTC        | F | INFUSION |
| osm7690 | AAATCAAGGATATGAGAATTCGAAAGAAAGTATGT         | F | INFUSION |
| osm7738 | TATAAAGCAATCAATATCAGCTTGTAAGTAAGCAC         | R | INFUSION |
| osm7739 | TACTTTACAAGCTGATATTGATTGCTTTTATAAGGAATTAAG  | F | INFUSION |
| osm7740 | GCTTATTAGAAGTGGCGCGCCTCTCTTAAGTTCATTGTTATTC | R | INFUSION |
| osm7875 | CTTCTTTGATTCTCATATGAACCTCAAAGAATGCG         | R | INFUSION |
| osm7876 | TTCTTTGAGGTTTCATATGAGAATCAAAGAAGTTATTGAT    | F | INFUSION |
| osm7877 | CTTCTGATTTACAGTGCTAGCCTTTTTGTACTCCAGTATTAT  | R | INFUSION |
| osm7878 | TTTTGTCCATCTTCATCGTCATCATTAAACAAGCAATAG     | R | INFUSION |
| osm7879 | CTTGTTAATGATGACGATGAAGATGGACAAAAAGACTAT     | F | INFUSION |
| osm7880 | AACTAGCCGTCATCATTGCTGCTCCGATCATGATCT        | R | INFUSION |
| osm7881 | CATGATCGGAGCAGCAATGATGACGGCTAGTTTTAAAG      | F | INFUSION |
| osm7882 | GAGTTTCACGCATTTCTCGAGTTGTTTTAATACTCCTTC     | R | INFUSION |
| osm8388 | ACTGGTTCTGCTGTTTCATAGCCCTGAGGGGGATTA        | R | INFUSION |
| osm8389 | CCCTCAGGGCTATGAACAGCAGAACCAGTACAAC          | F | INFUSION |
| osm8480 | ACTTAAGAGAGGATCCCCGGGTTAATTAAC              | F | INFUSION |
| osm8481 | ATTCCTTTTACCCGGTTTACTTGACAGCTCGTCC          | R | INFUSION |
| osm8482 | CGAGCTGTACAAGTAAACCGGGTAAAAGGAATGTC         | F | INFUSION |
| osm8483 | AGGGAACAAAAGCTGGAGC                         | R | INFUSION |
| osm8484 | GAAAAATATGAGGATCCCCGGGTTAATTAAC             | F | INFUSION |



**Table S3: Plasmids used in this study and their construction. Related to STAR Methods.**

For each plasmid, the column “obtained from” indicates how it was constructed, from restriction enzyme-based cloning or infusion, with the primers and restriction enzymes used. “WT” indicates that genomic DNA from a wildtype strain was used as template for PCR amplification.

| NAME    | DESCRIPTION                                                                              | OBTAINED FROM                                                                                                                                                                           | USAGE                                              |
|---------|------------------------------------------------------------------------------------------|-----------------------------------------------------------------------------------------------------------------------------------------------------------------------------------------|----------------------------------------------------|
| pAV133  | pUra4 <sup>AfeI</sup>                                                                    | 46                                                                                                                                                                                      | Single integration at <i>ura4</i>                  |
| pSM617  | pREP3x                                                                                   | Lab Stock                                                                                                                                                                               | Pombe expression                                   |
| pSM677  | pFA6a-mCherry-kanMX                                                                      | Lab Stock                                                                                                                                                                               | template for PCR-based HR                          |
| pSM684  | pFA6a-mCherry-natMX                                                                      | Lab Stock                                                                                                                                                                               | template for PCR-based HR                          |
| pSM685  | pFA6a-tdTomato-natMX                                                                     | Lab Stock                                                                                                                                                                               | template for PCR-based HR                          |
| pSM694  | pFA6a-bleMX                                                                              | Lab Stock                                                                                                                                                                               | template for PCR-based HR                          |
| pSM1538 | pFA6a-sfGFP-kanMX                                                                        | Lab Stock                                                                                                                                                                               | template for PCR-based HR                          |
| pSM1638 | pRIP-p <sup>fus1</sup> -sfGFP                                                            | Lab Stock                                                                                                                                                                               | Multiple integration at <i>ura4</i>                |
| pSM1650 | pRIP-p <sup>fus1</sup> -fus1N-sfGFP                                                      | Regular cloning :<br>pSM1638 <sup>NotI/BamHI</sup> +(WT <sup>osm3005-osm3026</sup> ) <sup>NotI/BamHI</sup>                                                                              | Multiple integration at <i>ura4</i>                |
| pSM1656 | pRIP-p <sup>fus1</sup> -fus1-sfGFP                                                       | Regular cloning :<br>pSM1638 <sup>NotI/XmaI</sup> +(WT <sup>osm3005-osm3006</sup> ) <sup>NotI/XmaI</sup>                                                                                | Multiple integration at <i>ura4</i>                |
| pSM1659 | pRIP-p <sup>fus1</sup> -fus1N-fus1C-sfGFP                                                | 3-point ligation cloning :<br>pSM1638 <sup>NotI/XmaI</sup> +(WT <sup>osm3005-osm3026</sup> ) <sup>NotI/BamHI</sup><br>+(WT <sup>osm3027-osm3006</sup> ) <sup>BamHI/XmaI</sup>           | Multiple integration at <i>ura4</i>                |
| pSM1662 | pRIP-p <sup>fus1</sup> -for3N-fus1C-sfGFP                                                | 3-point ligation cloning :<br>pSM1638 <sup>NotI/XmaI</sup> +(WT <sup>osm3007-osm3028</sup> ) <sup>NotI/BamHI</sup><br>+(WT <sup>osm3027-osm3006</sup> ) <sup>BamHI/XmaI</sup>           | Multiple integration at <i>ura4</i>                |
| pSM1663 | pRIP-p <sup>fus1</sup> -cdc12N-fus1C-sfGFP                                               | 3-point ligation cloning :<br>pSM1638 <sup>NotI/XmaI</sup> +(WT <sup>osm3009-osm3030</sup> ) <sup>NotI/BamHI</sup><br>+(WT <sup>osm3027-osm3006</sup> ) <sup>BamHI/XmaI</sup>           | Multiple integration at <i>ura4</i>                |
| pSM1823 | pRIP-p <sup>nmt41</sup> -sfGFP                                                           | Lab Stock                                                                                                                                                                               | Multiple integration at <i>ura4</i>                |
| pSM1826 | pRIP-p <sup>nmt41</sup> -fus1N-sfGFP                                                     | Subcloning :<br>pSM1650 <sup>KpnI/NotI</sup> +pSM1823 <sup>KpnI/NotI</sup>                                                                                                              | Multiple integration at <i>ura4</i>                |
| pSM2229 | pUra4 <sup>AfeI</sup> -p <sup>nmt41</sup> -fus1-sfGFP                                    | Lab Stock, Derived from pAV133                                                                                                                                                          | Single integration at <i>ura4</i>                  |
| pSM2251 | pFA6a-fus1 <sup>5'UTR</sup> -fus1 <sup>Δ501-749</sup> -sfGFP-kanMX-fus1 <sup>3'UTR</sup> | SDM :<br>pSM2827 <sup>osm5453/5454</sup>                                                                                                                                                | Single integration at endogenous <i>fus1</i> locus |
| pSM2390 | pRIP-p <sup>fus1</sup> -CRY2olig-For3N-fus1C-sfGFP                                       | Lab Stock, Derived from pAV133                                                                                                                                                          | Multiple integration at <i>ura4</i>                |
| pSM2475 | pUra4 <sup>AfeI</sup> -p <sup>fus1</sup> -CRY2PHR-fus1C-sfGFP                            | Lab Stock, Derived from pSM1662                                                                                                                                                         | Single integration at <i>ura4</i>                  |
| pSM2478 | pUra4 <sup>PmeI</sup> -p <sup>nmt41</sup> -fus1-sfGFP                                    | 3-point ligation cloning :<br>pSM2229 <sup>AatII/StuI</sup> +(pSM2229 <sup>osm4577-osm6582</sup> ) <sup>AatII/PmeI</sup><br>+(pSM2229 <sup>osm6583-osm6183</sup> ) <sup>PmeI/StuI</sup> | Single integration at <i>ura4</i>                  |
| pSM2507 | pFA6a-fus1 <sup>5'UTR</sup> -fus1 <sup>Δ501-749</sup> -sfGFP-kanMX-fus1 <sup>3'UTR</sup> | 3-point ligation cloning :<br>pSM2251 <sup>Sall/PacI</sup> +(pSM2251 <sup>osm1772-osm6576</sup> ) <sup>Sall/BamHI</sup><br>+(pSM2229 <sup>osm3031-osm3521</sup> ) <sup>BamHI/PacI</sup> | Single integration at endogenous <i>fus1</i> locus |
| pSM2600 | pUra4 <sup>PmeI</sup> -p <sup>nmt1</sup> -fus1N-sfGFP                                    | 3-point ligation cloning :<br>pSM2478 <sup>KpnI/SacI</sup> +(pSM617 <sup>osm3091-osm3516</sup> ) <sup>KpnI/NotI</sup><br>+pSM1826 <sup>NotI/SacI</sup>                                  | Single integration at <i>ura4</i>                  |
| pSM2601 | pUra4 <sup>PmeI</sup> -p <sup>nmt1</sup> -fus1N <sup>1-730</sup> -sfGFP                  | 3-point ligation cloning:<br>pSM2600 <sup>NotI/MscI</sup> +(pSM2600 <sup>osm3005-osm4021</sup> ) <sup>NotI/BamHI</sup> +(pSM2600 <sup>osm2217-osm6064</sup> ) <sup>BamHI/MscI</sup>     | Single integration at <i>ura4</i>                  |
| pSM2602 | pUra4 <sup>PmeI</sup> -p <sup>nmt1</sup> -fus1-sfGFP                                     | Subcloning :<br>pSM2600 <sup>NotI/XmaI</sup> +pSM1656 <sup>NotI/XmaI</sup>                                                                                                              | Single integration at <i>ura4</i>                  |
| pSM2625 | pFA6a-fus1 <sup>5'UTR</sup> -fus1 <sup>Δ492-791</sup> -sfGFP-kanMX-fus1 <sup>3'UTR</sup> | Infusion cloning :<br>pSM2507 <sup>Sall/PacI</sup> +WT <sup>osm7119-osm7140</sup> +WT <sup>osm7141-osm7122</sup>                                                                        | Single integration at endogenous <i>fus1</i> locus |
| pSM2630 | pUra4 <sup>PmeI</sup> -p <sup>nmt1</sup> -fus1N <sup>93-792</sup> -sfGFP                 | Infusion cloning :<br>pSM2600 <sup>NotI/XmaI</sup> +pSM2600 <sup>osm7204-osm7205</sup>                                                                                                  | Single integration at <i>ura4</i>                  |
| pSM2644 | pUra4 <sup>PmeI</sup> -p <sup>nmt1</sup> -fus1N <sup>1-500</sup> -sfGFP                  | Infusion cloning :<br>pSM2600 <sup>NotI/XmaI</sup> +pSM2600 <sup>osm7254-osm7255</sup>                                                                                                  | Single integration at <i>ura4</i>                  |
| pSM2645 | pUra4 <sup>PmeI</sup> -p <sup>nmt1</sup> -fus1N <sup>431-755</sup> -sfGFP                | Infusion cloning :<br>pSM2600 <sup>NotI/XmaI</sup> +pSM2600 <sup>osm7256-osm7257</sup>                                                                                                  | Single integration at <i>ura4</i>                  |

|         |                                                                                                                                       |                                                                                                                                                                |                                                    |
|---------|---------------------------------------------------------------------------------------------------------------------------------------|----------------------------------------------------------------------------------------------------------------------------------------------------------------|----------------------------------------------------|
| pSM2697 | pFA6a-fus1 <sup>5'UTR</sup> -fus1 <sup>Δ501-791</sup> -sfGFP-kanMX-fus1 <sup>3'UTR</sup>                                              | Infusion cloning :<br>pSM2507 <sup>Sall/Pacl</sup> +WT <sup>osm7119-osm7487</sup> +WT <sup>osm7488-osm7122</sup>                                               | Single integration at endogenous <i>fus1</i> locus |
| pSM2698 | pFA6a-fus1 <sup>5'UTR</sup> -fus1 <sup>Δ492-749</sup> -sfGFP-kanMX-fus1 <sup>3'UTR</sup>                                              | Infusion cloning :<br>pSM2507 <sup>Sall/Pacl</sup> +WT <sup>osm7119-osm7489</sup> +WT <sup>osm7490-osm7122</sup>                                               | Single integration at endogenous <i>fus1</i> locus |
| pSM2703 | pUra4 <sup>PmeI</sup> -p <sup>nmt1</sup> -fus1N <sup>191-792</sup> -sfGFP                                                             | Infusion cloning :<br>pSM2600 <sup>NotI/XmaI</sup> +pSM2600 <sup>osm7499-osm7205</sup>                                                                         | Single integration at <i>ura4</i>                  |
| pSM2825 | pUra4 <sup>PmeI</sup> -p <sup>nmt1</sup> -fus1N <sup>140-792</sup> -sfGFP                                                             | Infusion cloning :<br>pSM2600 <sup>NotI/XmaI</sup> +pSM2600 <sup>osm7638-osm7205</sup>                                                                         | Single integration at <i>ura4</i>                  |
| pSM2827 | pFA6a-fus1 <sup>5'UTR</sup> -fus1-sfGFP-kanMX-fus1 <sup>3'UTR</sup>                                                                   | Infusion cloning :<br>pSM1538 <sup>Sall/EcoRV</sup> +IBC180 <sup>osm7119-osm5452</sup>                                                                         | Single integration at endogenous <i>fus1</i> locus |
| pSM2912 | pFA6a-fus1 <sup>5'UTR</sup> -fus1 <sup>Δ492-500</sup> -sfGFP-kanMX-fus1 <sup>3'UTR</sup>                                              | Infusion cloning :<br>pSM2507 <sup>AfeI/Pacl</sup> +pSM2507 <sup>osm7127-osm7738</sup> +pSM2507 <sup>osm7739-osm7122</sup>                                     | Single integration at endogenous <i>fus1</i> locus |
| pSM2913 | pFA6a-fus1 <sup>5'UTR</sup> -fus1-kanMX-fus1 <sup>3'UTR</sup>                                                                         | Infusion cloning :<br>pSM2827 <sup>EcoRI/AscI</sup> +pSM2827 <sup>osm7690-osm7740</sup>                                                                        | Single integration at endogenous <i>fus1</i> locus |
| pSM2937 | pFA6a-fus1 <sup>5'UTR</sup> -fus1 <sup>1-491</sup> -CRY2PHR-fus1 <sup>792-1372</sup> -sfGFP-kanMX-fus1 <sup>3'UTR</sup>               | Infusion cloning :<br>pSM2625 <sup>Sall/XhoI</sup> +pSM2625 <sup>osm7119-osm7878</sup> +pSM2475 <sup>osm7879-osm7880</sup> +pSM2625 <sup>osm7881-osm7882</sup> | Single integration at endogenous <i>fus1</i> locus |
| pSM2938 | pFA6a-fus1 <sup>5'UTR</sup> -fus1 <sup>1-491</sup> -CRY2olig-fus1 <sup>792-1372</sup> -sfGFP-kanMX-fus1 <sup>3'UTR</sup>              | Infusion cloning :<br>pSM2625 <sup>Sall/XhoI</sup> +pSM2625 <sup>osm7119-osm7878</sup> +pSM2390 <sup>osm7879-osm7880</sup> +pSM2625 <sup>osm7881-osm7882</sup> | Single integration at endogenous <i>fus1</i> locus |
| pSM2939 | pFA6a-fus1 <sup>5'UTR</sup> -fus1 <sup>Δ731-791</sup> -sfGFP-kanMX-fus1 <sup>3'UTR</sup>                                              | Infusion cloning :<br>pSM2827 <sup>XhoI/NheI</sup> +pSM2827 <sup>osm7677-osm7875</sup> +pSM2827 <sup>osm7876-osm7877</sup>                                     | Single integration at endogenous <i>fus1</i> locus |
| pSM2940 | pFA6a-fus1 <sup>5'UTR</sup> -fus1 <sup>1-491</sup> -FUS-fus1 <sup>792-1372</sup> -sfGFP-kanMX-fus1 <sup>3'UTR</sup>                   | Infusion cloning :<br>pSM2625 <sup>XhoI/SwaI</sup> +fus1 <sup>XhoI</sup> site-491-FUS-fus1 <sup>792</sup> -SwaI site ordered as a gBlock                       | Single integration at endogenous <i>fus1</i> locus |
| pSM2941 | pFA6a-fus1 <sup>5'UTR</sup> -fus1 <sup>1-491</sup> -FUS <sup>12E</sup> -fus1 <sup>792-1372</sup> -sfGFP-kanMX-fus1 <sup>3'UTR</sup>   | Infusion cloning :<br>pSM2625 <sup>XhoI/SwaI</sup> +fus1 <sup>XhoI</sup> site-491-FUS <sup>12E</sup> -fus1 <sup>792</sup> -SwaI site ordered as a gBlock       | Single integration at endogenous <i>fus1</i> locus |
| pSM3032 | pFA6a-fus1 <sup>5'UTR</sup> -fus1 <sup>1-491</sup> -FUS <sup>G156E</sup> -fus1 <sup>792-1372</sup> -sfGFP-kanMX-fus1 <sup>3'UTR</sup> | Infusion cloning :<br>pSM2827 <sup>XhoI/NheI</sup> +pSM2940 <sup>osm7677-osm8388</sup> +pSM2940 <sup>osm8389-osm7877</sup>                                     | Single integration at endogenous <i>fus1</i> locus |
| pSM3034 | pFA6a-fus1 <sup>5'UTR</sup> -fus1 <sup>1-491</sup> -CRY2PHR-fus1 <sup>792-1372</sup> -kanMX-fus1 <sup>3'UTR</sup>                     | Subcloning :<br>pSM2913 <sup>Sall/NheI</sup> +pSM2937 <sup>NotI/XmaI</sup>                                                                                     | Single integration at endogenous <i>fus1</i> locus |
| pSM3035 | pFA6a-fus1 <sup>5'UTR</sup> -fus1 <sup>1-491</sup> -CRY2olig-fus1 <sup>792-1372</sup> -kanMX-fus1 <sup>3'UTR</sup>                    | Subcloning :<br>pSM2913 <sup>Sall/NheI</sup> +pSM2938 <sup>NotI/XmaI</sup>                                                                                     | Single integration at endogenous <i>fus1</i> locus |
| pSM3036 | pFA6a-fus1 <sup>5'UTR</sup> -fus1 <sup>1-491</sup> -FUS-fus1 <sup>792-1372</sup> -kanMX-fus1 <sup>3'UTR</sup>                         | Subcloning :<br>pSM2913 <sup>Sall/NheI</sup> +pSM2940 <sup>NotI/XmaI</sup>                                                                                     | Single integration at endogenous <i>fus1</i> locus |
| pSM3037 | pFA6a-fus1 <sup>5'UTR</sup> -fus1 <sup>1-491</sup> -FUS <sup>12E</sup> -fus1 <sup>792-1372</sup> -kanMX-fus1 <sup>3'UTR</sup>         | Subcloning :<br>pSM2913 <sup>Sall/NheI</sup> +pSM2941 <sup>NotI/XmaI</sup>                                                                                     | Single integration at endogenous <i>fus1</i> locus |
| pSM3055 | pUra4 <sup>PmeI</sup> -p <sup>nmt1</sup> -fus1-mCherry                                                                                | Infusion cloning :<br>pSM2602 <sup>XmaI/SacI</sup> +pSM684 <sup>osm8480-osm8481</sup> +pSM2602 <sup>osm8482-osm8483</sup>                                      | Single integration at <i>ura4</i>                  |
| pSM3056 | pUra4 <sup>PmeI</sup> -p <sup>nmt1</sup> -fus1-mCherry                                                                                | Infusion cloning :<br>pSM2600 <sup>XmaI/SacI</sup> +pSM684 <sup>osm8484-osm8481</sup> +pSM2602 <sup>osm8482-osm8483</sup>                                      | Single integration at <i>ura4</i>                  |
